# Supplementary material for: Influence of Low FODMAP and Gluten-Free Diets on Gut Microbiota Alternations and Symptom Severity in Iranian Patients With Irritable Bowel Syndrome; A Clinical Trial Study
Source: Research Square preprint supplement (doi:10.21203/rs.3.rs-136688/v1), 2021-02-06
Supplement: Supplementary file 1 [file dd566d336fcf37ebff2023aa.docx]

**Influence of low FODMAP and gluten-free diets on gut microbiota alternations and symptom severity in Iranian patients with irritable bowel syndrome; a clinical trial study**

Running title: Influence of low FODMAP & gluten-free on IBS gut microbiota

**Kaveh Naseri
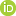
a, Hossein Dabiria, Mohammad Rostami Nejadb, *, Abbas Yadegarc, *, Hamidreza Houric, Meysam Olfatifarb, Amir Sadeghib, Saeede Saadatib,** [**Mohammad Javad Nasiri**](https://scholar.google.com/citations?hl=en&user=5PyhUkIAAAAJ)**a , Carolina Ciaccie, Paola Iovinoe, Mohammad Reza Zalib**

a *Department of Microbiology, School of Medicine, Shahid Beheshti University of Medical Sciences, Tehran, Iran*

b *Celiac Disease Department, Gastroenterology and Liver Diseases Research Center, Research Institute for Gastroenterology and Liver Diseases, Shahid Beheshti University of Medical Sciences, Tehran, Iran*

c *Foodborne and Waterborne Diseases Research Center, Research Institute for Gastroenterology and Liver Diseases, Shahid Beheshti University of Medical Sciences, Tehran, Iran*

d *Gastroenterology and Liver Diseases Research Center, Research Institute for Gastroenterology and Liver Diseases, Shahid Beheshti University of Medical Sciences, Tehran, Iran*

*e Gastrointestinal Unit, Department of Medicine, Surgery and Dentistry Scuola Medica Salernitana, Università di Salerno, Via Allende, 84081 Salerno, Italy*

| **Target taxon** | **Primer name** | **Primer sequence (5ꞌ-3ꞌ)** | **Amplicon length (bp)** | **Reference** |
| --- | --- | --- | --- | --- |
| Eubacteria | UniF340  UniR514 | ACTCCTACGGGAGGCAGCAGT  ATTACCGCGGCTGCTGGC | ~ 200 bp | [24] |
| Lactobacillus spp. | Lacto-F  Lacto-R | TGGATGCCTTGGCACTAG  AAATCTCCGGATCAAAGCTTAC | ~ 89 bp | [25] |
| Bifidobacterium spp. | Bifid-F  Bifid-R | GGGATGCTGGTGTGGAAGAG  TGCTCGCGTCCACTATCCAG | ~ 200 bp | [25] |
| Bacteroidetes | Bac960-F  Bac1100-R | GTTTAATTCGATGATACGCG  TTAAGCCGACACCTCACG | ~ 137 bp | [26] |
| Firmicutes | Firm934-F  Firm1060-R | GGAG**Y**ATGTGGTTTAATTCGAAGCA  AGCTGACGACAACCATGCAC | ~ 129 bp | [26] |
| Actinobacteria | Actino-F  Actino-R | GCG**K**CCTATCAGCTTGTTGGTG  CCGCCTACGAGC**Y**CTTTACGC | ~ 333 bp | [27] |
| Enterobacteriaceae | Enterob-F  Enterob-R | CGTCGCAAGM**M**CAAAGAG  TTACCGCGGCTGCTGGCAC | ~ 351 bp | [27] |
| Streptococcus spp. | Str1-F  Str2-R | GTACAGTTGCTTCAGGACGT  GTTCGATTTCRTCACGTTG | ~ 195 bp | [28] |
| Ruminococcus | Rflbr730F  Clep866mR§ | GGCGGCYT**R**CTGGGCTTT  GCAGGTGGAT**W**ACTTATTGTGTTAA | ~ 157 bp | [29] |

Table S1. The taxon-specific primers used in this study.
